# Supplementary material
Source: ML conference proceedings conference paper supplement (https://openaccess.thecvf.com/content/cvpr_2016/html/Trager_Consistency_of_Silhouettes_2016_CVPR_paper.html)
Supplement: Supplementary file 1 [file Trager_Consistency_of_Silhouettes_2016_CVPR_supplemental.pdf]

# Consistency of silhouettes and their duals

## Supplementary material

Matthew Trager\*

Inria

Martial Hebert

Carnegie Mellon University

Jean Ponce\*

École Normale Supérieure / PSL Research University

## Contents

This supplementary material clarifies some technical aspects of convex duality in the projective setting, and completes two proofs that were only sketched in the main body of the paper.

## 1. Convex cones and polarity

Before discussing convexity in projective spaces we need to recall some basic definitions about *convex cones*. More details can be found in [1, 2]

A set  $C$  in a real vector space  $V$  is a *cone* if  $x \in C$  implies  $\lambda x \in C$  for all  $\lambda \geq 0$ . A cone  $C$  is *pointed* if it contains no line, *i.e.*, if  $x \in C$  and  $-x \in C$  then  $x = 0$ . Finally, a cone  $C$  is *solid* if it has a non-empty interior.

For any cone  $C \subseteq V$ , we can define the *polar cone*  $C^\circ \subseteq V^*$  (we denote by  $V^*$  the space of linear functionals on  $V$ ):

$$C^\circ = \{\varphi \in V^* \mid \varphi(x) \leq 0, \forall x \in C\} \quad (1)$$

We should note that many authors only consider  $V = \mathbb{R}^N$  and identify  $\mathbb{R}^N$  and  $(\mathbb{R}^N)^*$  by using the standard scalar product; for our purposes it is useful to keep the two spaces distinct.

For any cone  $C$ , the polar cone  $C^\circ$  is closed and convex. Moreover, the following properties hold (see [1]):

- If  $C$  is solid, then  $C^\circ$  is pointed.
- If the closure of  $C$  is pointed, then  $C^\circ$  is solid.
- $C^{\circ\circ}$  is the closure of the convex hull of  $C$ . In particular, if  $C$  is convex and closed,  $C^{\circ\circ} = C$ .

## 2. Convex sets in projective space

Let us first recall that an *affine chart* in projective space  $\mathbb{P}^n$  is simply the complement of any hyperplane  $A = \mathbb{P}^n \setminus H$ : in practice,  $A$  may be seen as a copy of affine space in  $\mathbb{P}^n$ . In fact, any affine chart can be described as  $A = \{[x] \in \mathbb{P}^n \mid \varphi(x) = 1\}$  for some  $\varphi \in (\mathbb{R}^{n+1})^*$  (this

is the complement of the set  $H = \{[x] \mid \varphi(x) = 0\}$ ), so this provides an identification with the affine hyperplane  $\{x \in \mathbb{R}^{n+1} \mid \varphi(x) = 1\}$  in  $\mathbb{R}^{n+1}$ . In general, it will be convenient to say that a set  $T \subseteq \mathbb{P}^n$  is *finite* if its closure is contained in some affine chart (*i.e.*, if the closure of  $T$  does not intersect all hyperplanes).

For any set  $S \subseteq \mathbb{R}^{n+1}$ , we can consider the projectivization  $\mathbb{P}S = \{[x] \in \mathbb{P}^n \mid x \in S\} \subseteq \mathbb{P}^n$ , consisting of all classes of vectors up to scale that contain elements of  $S$ . Conversely, if  $T \subseteq \mathbb{P}^n$  is *connected* and *finite*, there are exactly two *pointed* cones  $C_1, C_2$  such that  $\mathbb{P}C_i = T$ , and these are such that  $C_1 = -C_2$ . We will say that  $C_i$  is a cone *over*  $T$ . We now give the following definition:

**Definition 1.** A closed finite set  $K \subseteq \mathbb{P}^n$  is *convex* if there exists a closed pointed convex cone  $C \subseteq \mathbb{R}^{n+1}$  such that  $K = \mathbb{P}C$ .

As stated in the paper, the following fact holds.

**Proposition 1.** A finite set  $K \subseteq \mathbb{P}^n$  is convex if and only if there exists a affine chart where  $K$  is compact and convex in the affine sense.

*Proof.* If  $C$  is a pointed convex cone in  $\mathbb{R}^{n+1}$ , there exists  $\varphi \in (\mathbb{R}^{n+1})^*$  such that  $\varphi(x) < 0$  for all  $x \in C \setminus \{0\}$ . Thus, if  $K = \mathbb{P}C$ ,  $K$  is contained in the affine chart  $\{[x] \in \mathbb{P}^n \mid \varphi(x) = 1\}$ , and in this chart it is compact and convex as an affine set. Conversely, if  $K$  is compact and convex in  $\{[x] \in \mathbb{P}^n \mid \varphi(x) = 1\}$ , then  $C = \{x \in \mathbb{R}^{n+1} \mid [x] \in K, \varphi(x) \geq 0\}$  is a closed pointed convex cone in  $\mathbb{R}^{n+1}$  such that  $\mathbb{P}C = K$ .  $\square$

For any finite and connected set  $T \subseteq \mathbb{P}^n$ , we can define the *convex hull* in  $\mathbb{P}^n$  of  $T$  as  $\mathbb{P}Conv(C)$  where  $C \subseteq \mathbb{R}^{n+1}$  is one of the two pointed cones over  $T$  (the projectivization makes the choice of  $C$  irrelevant).

Finally, we can define the *dual*  $T^\circ \subseteq (\mathbb{P}^n)^*$  of a finite set  $T \subseteq \mathbb{P}^n$  as  $\mathbb{P}C^\circ$  for a pointed cone over  $C$  over  $S$  (again, the choice is irrelevant). Note that since Definition 1 requires a convex set to be the projectivization of *pointed* convex cones, it is possible that the dual of a convex set  $K \subseteq \mathbb{P}^n$

\*Willow project team. DI/ENS, ENS/CNRS/Inria UMR 8548.

may not be convex: indeed, if  $C \subseteq \mathbb{R}^{n+1}$  is a convex cone with empty interior, then  $C^\circ$  is not pointed.

The next result shows that the convex dual of a set  $T \subseteq \mathbb{P}^n$  coincides with the closure of the hyperplanes that do not meet  $T$  in  $\mathbb{P}^n$ :

**Proposition 2.** *Let  $T \subseteq \mathbb{P}^n$  be a finite connected set and let  $C$  be a pointed cone over  $T$ . A hyperplane  $[\varphi] \in (\mathbb{P}^n)^*$  belongs to  $T^\circ$  if and only if  $\varphi(x) \geq 0$  for all  $x \in C$  or  $\varphi(x) \leq 0$  for all  $x \in C$ .*

*Proof.* By definition  $T^\circ = \mathbb{P}C^\circ$  and  $C^\circ = \{\varphi \in (\mathbb{R}^n)^* \mid \varphi(x) \leq 0, \forall x \in C\}$ : it is clear now that if  $[\varphi] \in \mathbb{P}C^\circ$  then necessarily  $\varphi \in C^\circ$  or  $-\varphi \in C^\circ$ .  $\square$

### 3. Proofs

We now use polarity for convex cones to revisit the proofs from Section 3.2 of the paper. For any finite connected set  $S \subseteq \mathbb{P}^n$ , we denote by  $\hat{S}$  an arbitrary pointed cone over  $S$ . We also indicate with  $\hat{\mathcal{M}}$  a linear projection map  $\hat{\mathcal{M}} : \mathbb{R}^4 \rightarrow \mathbb{R}^3$  associated with a perspective projection  $\mathcal{M}$  on  $\mathbb{P}^3$ .

**Proposition 3.** *Let  $\mathcal{M}$  be a perspective projection with center  $\mathbf{c}$ , and let  $K \subseteq \mathbb{P}^3 \setminus \{\mathbf{c}\}$  be a convex set. Then  $\mathcal{M}(K) = L$  is equivalent to*

$$\mathcal{M}^*(L^\circ) = K^\circ \cap \mathbf{c}^*. \quad (2)$$

*Proof.* It is enough to show the analogous property for cones in  $\mathbb{R}^4$ , namely that  $\hat{\mathcal{M}}(\hat{K}) = \hat{L}$  is equivalent to  $\hat{\mathcal{M}}^*(\hat{L}^\circ) = \hat{K}^\circ \cap \hat{\mathbf{c}}^\perp$ , where  $\hat{\mathcal{M}}^* : (\mathbb{R}^3)^* \rightarrow (\mathbb{R}^4)^*$  is the dual map associated with  $\hat{\mathcal{M}}$  (i.e., the map  $\varphi \mapsto \varphi \circ \hat{\mathcal{M}}$  for  $\varphi \in (\mathbb{R}^3)^*$ ), and  $\hat{\mathbf{c}}^\perp$  denotes the hyperplane in  $(\mathbb{R}^4)^*$  of all linear functionals that vanish on the null-space of  $\hat{\mathcal{M}}$ . Indeed, we have that:

$$\begin{aligned} \hat{L} &= \{\hat{\mathcal{M}}(x) \mid x \in \hat{K}\} \\ \Leftrightarrow \hat{L}^\circ &= \{\varphi \in (\mathbb{R}^3)^* \mid \varphi(\hat{\mathcal{M}}(x)) \leq 0, \forall x \in \hat{K}\} \\ \Leftrightarrow \hat{L}^\circ &= \{\psi \in (\mathbb{R}^4)^* \mid \psi(x) \leq 0, \forall x \in \hat{K}\} \cap \text{Im}(\hat{\mathcal{M}}^*) \\ \Leftrightarrow \hat{L}^\circ &= \hat{K}^\circ \cap \hat{\mathbf{c}}^\perp. \end{aligned} \quad (3)$$

where we used the basic fact that  $\text{Im}(\hat{\mathcal{M}}^*) = \hat{\mathbf{c}}^\perp$ .  $\square$

**Proposition 4.** *A family  $L_1, \dots, L_n$  of convex sets in  $\mathbb{P}^2$  is consistent for a set of projections  $\mathcal{M}_1, \dots, \mathcal{M}_n$  if and only if  $L_1^\circ, \dots, L_n^\circ$  are sectionally consistent for the embeddings  $\mathcal{M}_1^*, \dots, \mathcal{M}_n^*$ . Moreover, if consistency holds, and  $H$  is the visual hull associated with  $L_1, \dots, L_n$ , then  $H = K^\circ$ , where  $K$  is the convex hull of  $\mathcal{M}_1^*(L_1^\circ), \dots, \mathcal{M}_n^*(L_n^\circ)$ .*

*Proof.* The only thing that remains to be shown is that  $(\mathcal{M}_i^*(L_i^\circ))^\circ$  is in fact the visual cone  $C_i$ . This prove this, we use the following relations for cones in  $\mathbb{R}^4$ :

$$\begin{aligned} (\hat{\mathcal{M}}_i^*(\hat{L}_i^\circ))^\circ &= \{x \in \mathbb{R}^4 \mid \psi(x) \leq 0 \forall \psi \in \hat{\mathcal{M}}_i^*(\hat{L}_i^\circ)\} \\ &= \{x \in \mathbb{R}^4 \mid \varphi(\hat{\mathcal{M}}(x)) \leq 0 \forall \varphi \in \hat{L}_i^\circ\} \quad (4) \\ &= \{x \in \mathbb{R}^4 \mid \hat{\mathcal{M}}(x) \in \hat{L}_i\}. \end{aligned}$$

Note that while  $\{x \in \mathbb{R}^4 \mid \hat{\mathcal{M}}(x) \in \hat{L}_i\}$  is a convex cone in  $\mathbb{R}^4$ , its projectivization coincides with the two sided projective cone  $C_i$ , which is *not* convex for Definition 1 (indeed, the set  $\mathcal{M}_i^*(L_i^\circ)$  has empty interior).  $\square$

### References

- [1] S. Boyd and L. Vandenberghe. *Convex optimization*. Cambridge university press, 2004. **1**
- [2] R. Schneider. *Convex bodies: the Brunn–Minkowski theory*. Number 151. Cambridge University Press, 2013. **1**
